# Supplementary material for: Construction of an inert framework in porous SiOx/Si anodes for high-performance Li-ion batteries
Source: Royal Society of Chemistry journal article supplement (doi:10.1039/d6ra03303b), 2026-06-02
Supplement: d6ra03303b1.pdf [file d6ra03303b1.pdf]

### Supporting Information

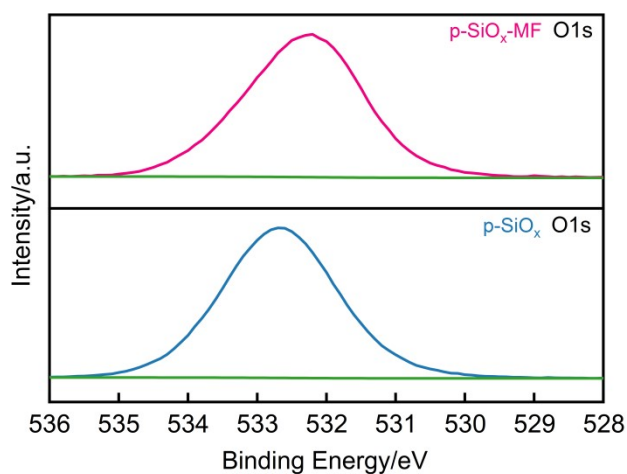

Figure S1. XPS spectra of O1s.

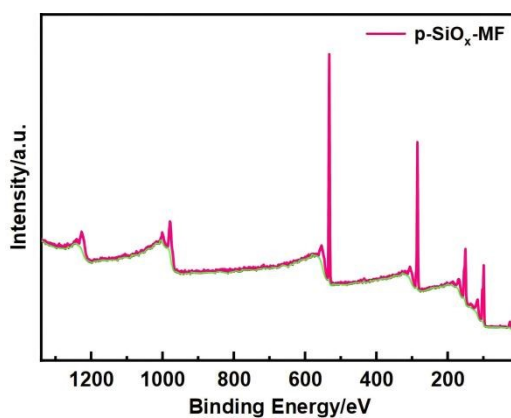

Figure S2. XPS survey spectrum of the as-prepared p-SiO<sub>x</sub>-MF composite.

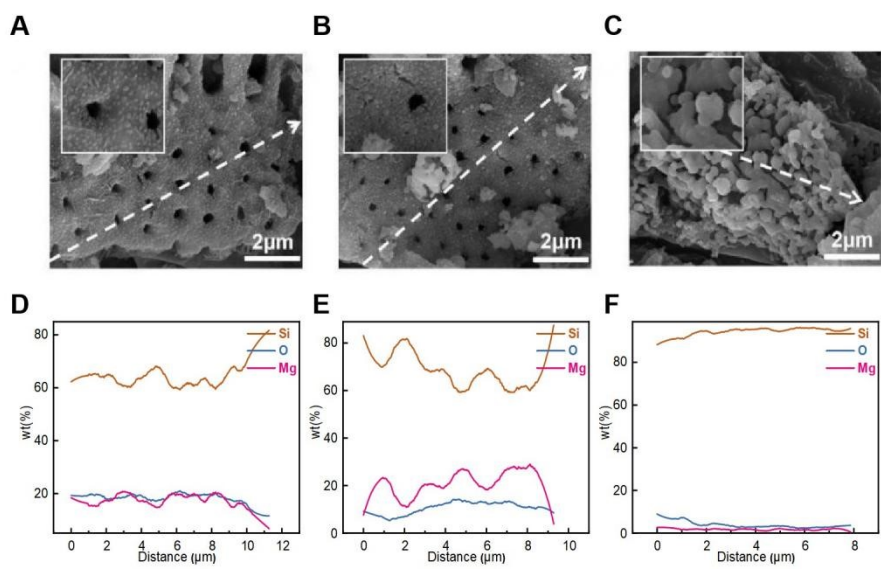

Figure S3. SEM image of (a) SiOx-MF and (b) p-SiOx-MF and (c) SiOx-MF. linear sweep of (d) SiOx-MF and (e) p-SiOx-MF and (f) SiOx-MF.

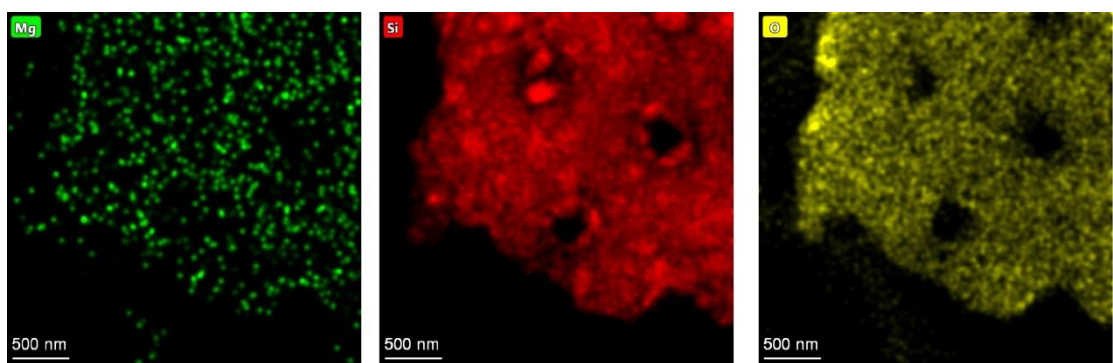

Figure S4. Corresponding EDS mapping of p-SiOx-MF.

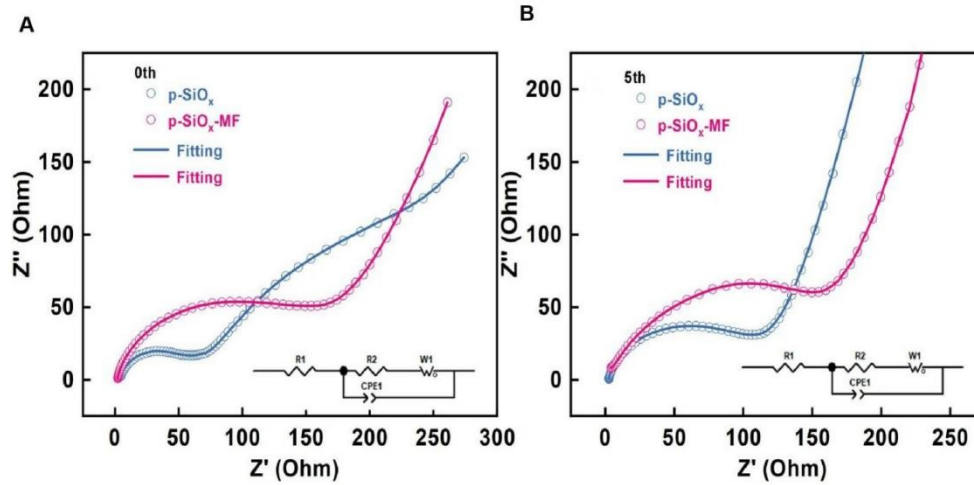

Figure S5. Nyquist plots of p-SiO<sub>x</sub>-MF and p-SiO<sub>x</sub> insert shows the equivalent circuit model of the studied system.

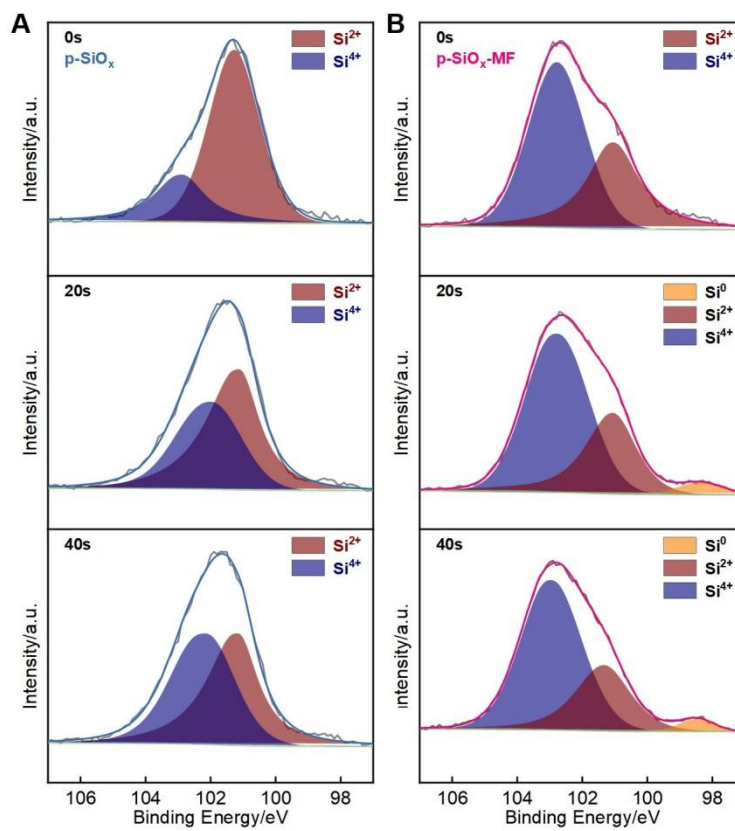

Figure S6. XPS profiles of Si 2p of (A) p-SiO<sub>x</sub> and (B) p-SiO<sub>x</sub>-MF after the 5th cycles. All spectra were measured in the middle of the film after etching and then charge-corrected.

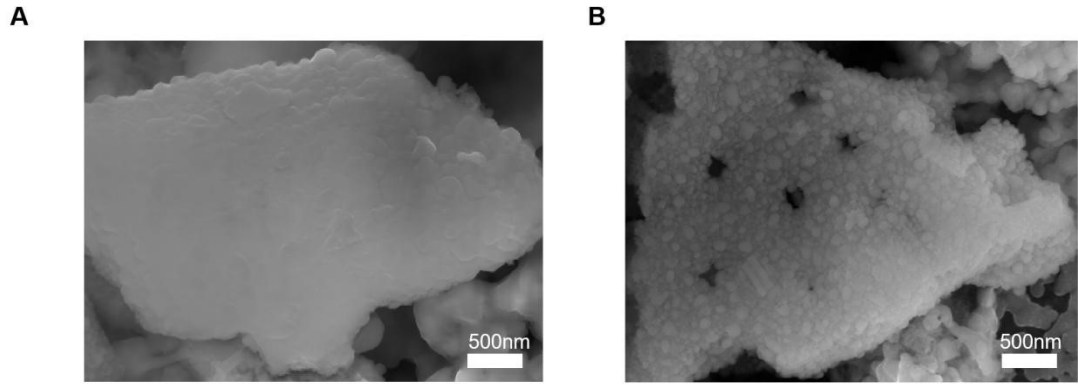

Figure S7. SEM image of (A)p-SiOx-MF and (B) SiOx after the 5th cycles.

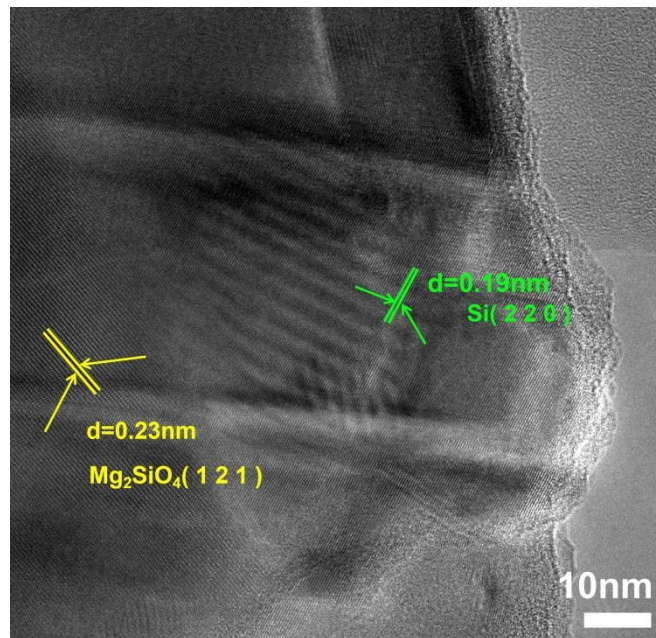

Figure S8. TEM image of p-SiOx-MF after the 5th cycles.

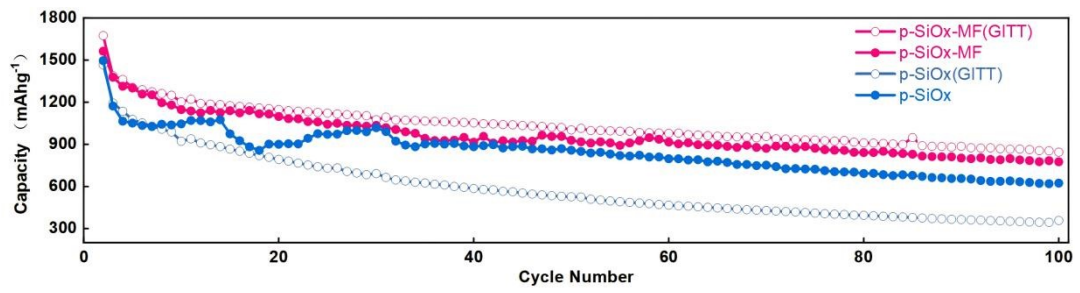

Figure S9. Impact of periodic GITT testing on long-cycle stability (3rd, 10th, 30th, 50th, and 100th tests constitute GITT evaluations).

TableS1. Comparison of different working performance

| Material System                                                             | Initial Coulombic Efficiency (%) | Reversible Capacity (mAh/g) | Cycling Performance                                                                                                  |
|-----------------------------------------------------------------------------|----------------------------------|-----------------------------|----------------------------------------------------------------------------------------------------------------------|
| <b>p-SiO<sub>x</sub>-MF (This work)</b>                                     | <b>56</b>                        | <b>2494</b>                 | <b>775.8atmAhg<sup>-1</sup> after 100 cycles</b>                                                                     |
| Ji et al. (2024) d-SiO/C/LSO                                                | 90.3                             | 1465                        | 45.2% capacity retention after 100 cycles at 0.5C in half-cell; 86.5% retention after 100 cycles in NCM811 full-cell |
| Li et al. (2023) High-density Si-C composite                                | 83.5–85.0                        | ~600                        | 96.2% retention over 200 cycles at 0.5C; 70.6% retention over 200 cycles in LFP full-cell                            |
| Liu et al. (2025) Si@h-SiO <sub>x</sub> /C                                  | ~69.0                            | 1520                        | 70% retention over 300 cycles at 1 A/g; 94.4% retention for 300 cycles in pouch cell                                 |
| Mamiya et al. (2023) SiO-C stacked film                                     | —                                | 2188.8                      | 94% capacity retention over 500 cycles at 0.1C                                                                       |
| Sun et al. (2023) SiO <sub>x</sub> /C with different carbon microstructures | 69–85                            | 700–900                     | 92.2%–98.5% retention after 100 cycles                                                                               |
| Youn et al. (2024) Porous Si/Ca-Si-O                                        | 86.4                             | 964.3                       | 55% capacity retention over 200 cycles                                                                               |
| Single carbon-coated SiO                                                    | 76.7                             | 1737                        | 33.3% retention after 100 cycles at 0.5C                                                                             |
| Single LiH-prelithiated SiO                                                 | 81.0                             | 1438                        | Only 1.2% retention after 100 cycles at 0.5C                                                                         |
| Commercial graphite                                                         | 92–94                            | 372                         | ≥90% retention after 100 cycles at                                                                                   |

| <b>Material System</b> | <b>Initial Coulombic Efficiency (%)</b> | <b>Reversible Capacity (mAh/g)</b> | <b>Cycling Performance</b> |
|------------------------|-----------------------------------------|------------------------------------|----------------------------|
|                        |                                         |                                    | 1C                         |

References:

- 1 S. Ji, R. Song, H. Yuan, D. Lv, L. Yang, J. Luan, D. Wan, J. Liu and C. Zhong, *Journal of Electroanalytical Chemistry*, 2024, 959, 118141.
- 2 H. Li, Z. Chen, Z. Kang, W. Liu and Y. Chen, *Energy Storage Materials*, 2023, 56, 40–49.
- 3 Z. Liu, S. Wang, M. Zheng, Y. Zhang, R. Yu, X. Chen, W. Xiong, Z. Xu, Z. Zhuang, Y. Xia and L. Shen, *Advanced Materials*, 2026, 38, e17989.
- 4 M. Mamiya and J. Akimoto, *Results in Chemistry*, 2023, 5, 100815.
- 5 Q. Sun, J. Li, M. Yang, S. Wang, G. Zeng, H. Liu, J. Cheng, D. Li, Y. Wei, P. Si, Y. Tian and L. Ci, *Small*, 2023, 19, 2300759.
- 6 D. Youn, N. G. Kim, J. Y. Kim, S. T. Kim, D. J. Chung and H. Kim, *Journal of Energy Storage*, 2024, 89, 111641.
- 7 H. Zhen, F. Meng, J. Gao, Y. Liu and X. Liu, *Small*, 2023, 19, 2300500.
- 8 M. Li, D. Lu, J. Wang, S. Zhang, L. Lv, B. Ma, H. Zhu, L. Li, S. Yang, Z. Li, Y. Wu, J. Qi, L. Fan, R. Li, L. Chen, T. Deng and X. Fan, *Nat Commun*, 2026, 17, 3953.
- 9 Y. Li, J. Guo, K. Pedersen, L. Gurevich and D.-I. Stroe, *Journal of Energy Chemistry*, 2023, 80, 237–246.
